# Supplementary material for: Nuclear Nestin deficiency drives tumor senescence via lamin A/C-dependent nuclear deformation
Source: PubMed Central journal article supplement (PMC6127343; doi:10.1038/s41467-018-05808-y), 2018-09-06
Supplement: 41467_2018_5808_MOESM5_ESM.pdf [file 41467_2018_5808_MOESM5_ESM.pdf]

## **Description of Additional Supplementary Files**

File Name: Supplementary Movie 1

Description: Super-resolution 3-D image of the subcellular localization of Nestin and lamin A/C in A549

File Name: Supplementary Movie 2

Description: Super-resolution 3-D image of the subcellular localization of Nestin and lamin A/C in H1299
